# Supplementary material
Source: Springer Nature journal article supplement (https://www.springermedizin.de/resource/supplementary/12889_2013_6016_MOESM3_ESM.pdf/9494168)

Elements from models of health behaviour change

New elements specific to the workplace setting

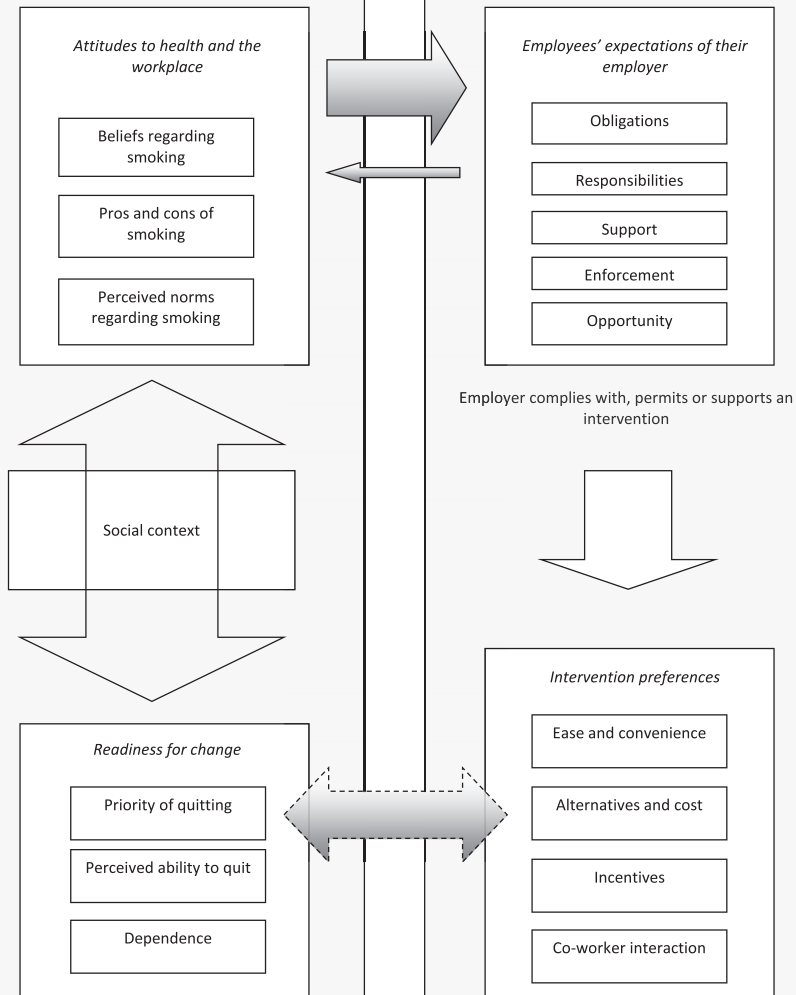

Supplement: MOESM3 [file 9494168]
